# Supplementary material for: Open metal site (OMS)-inspired investigation of adsorption and catalytic functions in a porous metal–organic framework (MOF)
Source: Royal Society of Chemistry journal article supplement (doi:10.1039/d2dt02098j), 2022-01-01
Supplement: d2dt02098j1.pdf [file d2dt02098j1.pdf]

## **Open Metal Sites (OMSs) Inspired Investigation of Adsorption and Catalytic Functions in a Porous Metal-Organic Framework (MOF)**

Anand Yadav,<sup>†,a</sup> Sarita Kumari,<sup>†,a</sup> Preety Yadav,<sup>a</sup> Arpan Hazra,<sup>b</sup> Anindita Chakraborty,<sup>a,\*</sup> Prakash Kanoo<sup>a,\*</sup>

*<sup>a</sup>Department of Chemistry, School of Basic Sciences, Central University of Haryana, Jant-Pali, Mahendergarh 123031, Haryana, India*

*<sup>b</sup>Chair of Inorganic Chemistry I, Technische Universität Dresden, 01069 Dresden, Germany*

<sup>†</sup>Authors contributed equally

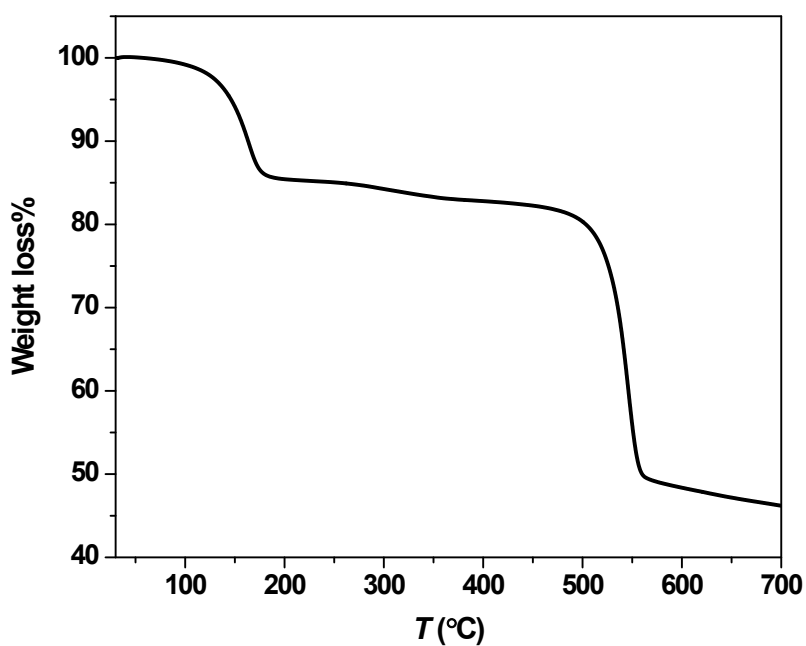

**Fig. S1.** TGA curve of compound **1** in the temperature range 30 - 700 °C (heating rate 5 °C/min under nitrogen).

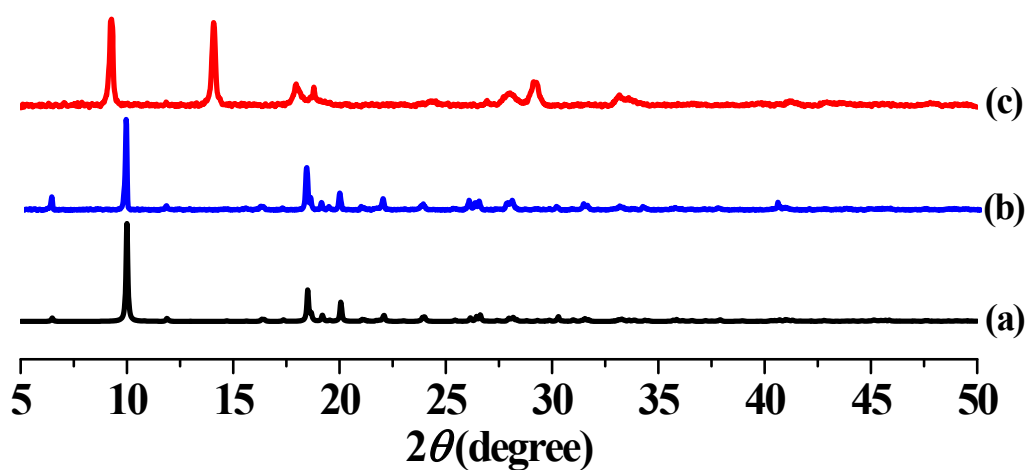

**Fig. S2.** Powder X-ray diffraction (PXRD) study of compound **1**. (a) simulated pattern; (b) assynthesized pattern and (c) desolvated pattern. Similarity of the assynthesized pattern with the simulated pattern indicates purity of the sample.

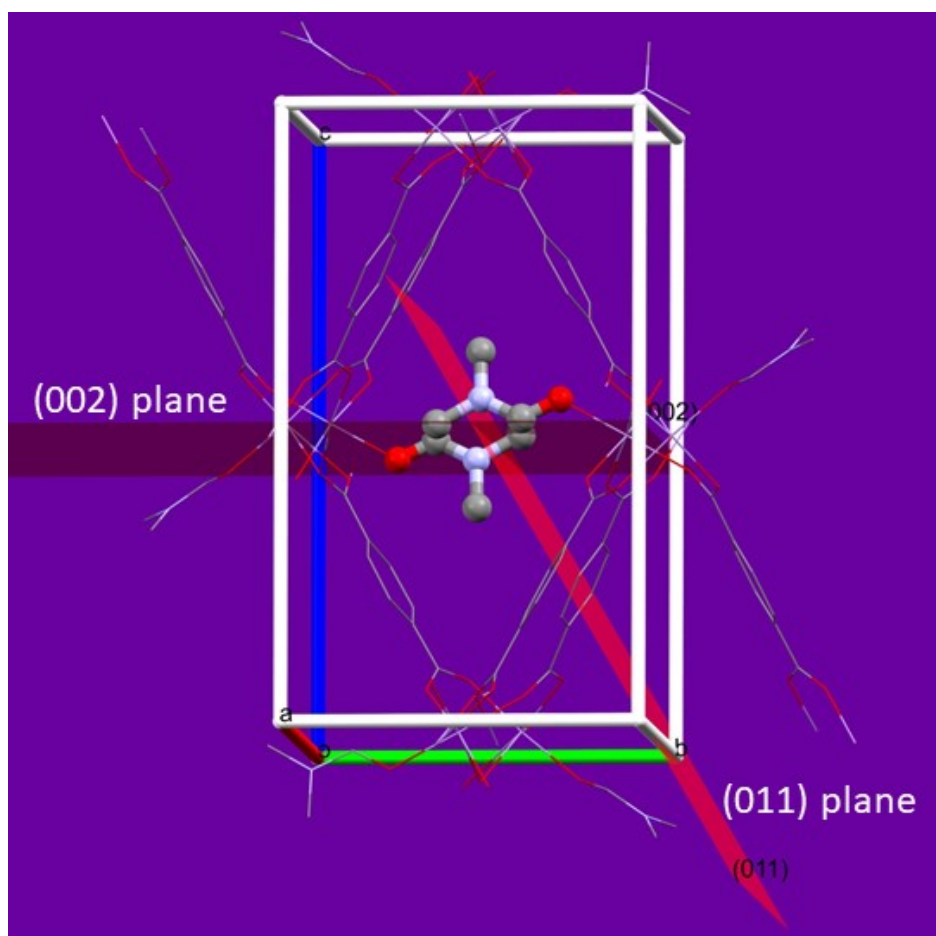

**Fig. S3.** View of the structure of compound **1** along the crystallographic *a* direction shows that (011) and (002) planes contains coordinated N,N-Dimethylformamide (DMF) molecules.

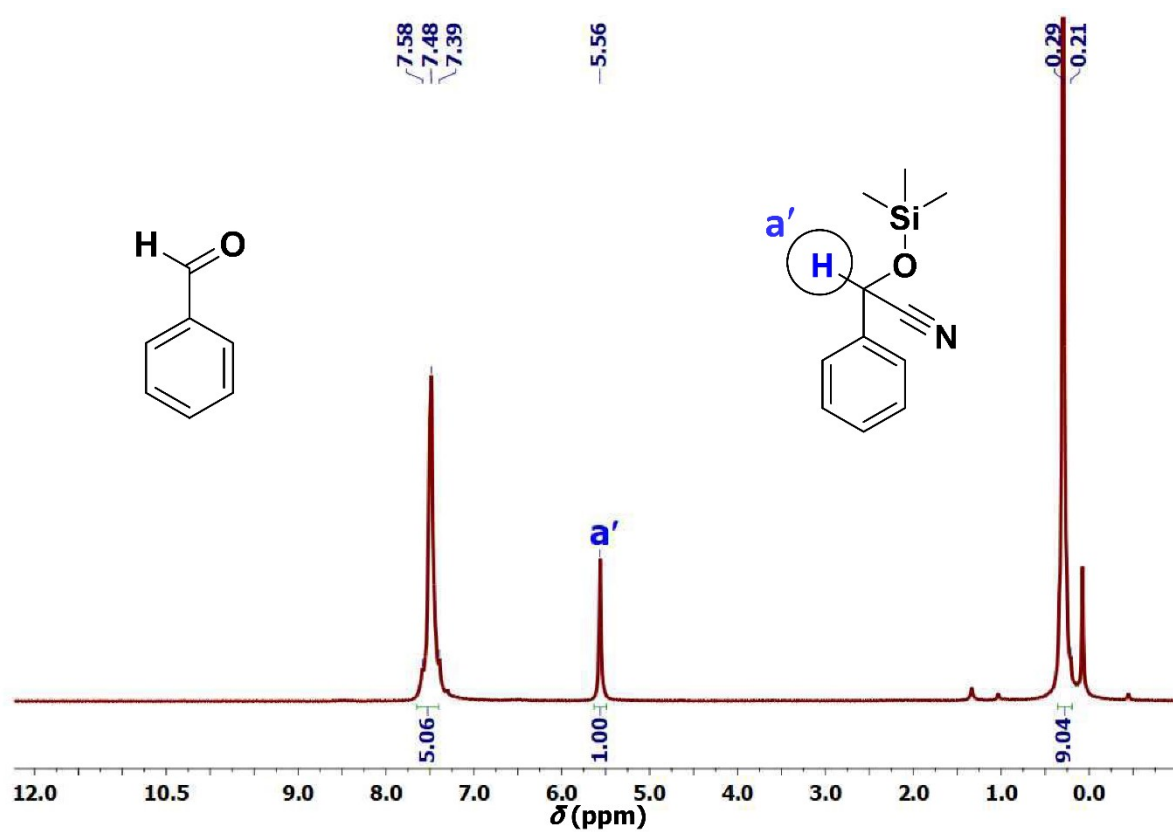

**Fig. S4.**  $^1\text{H}$  NMR spectrum of the product 2-(phenyl)-2-((trimethylsilyl)oxy)acetonitrile obtained *via* cyanosilylation reaction of benzaldehyde (Entry 1 in Table 2) recorded in  $\text{CDCl}_3$ . The percentage conversion calculated for the product is 100.

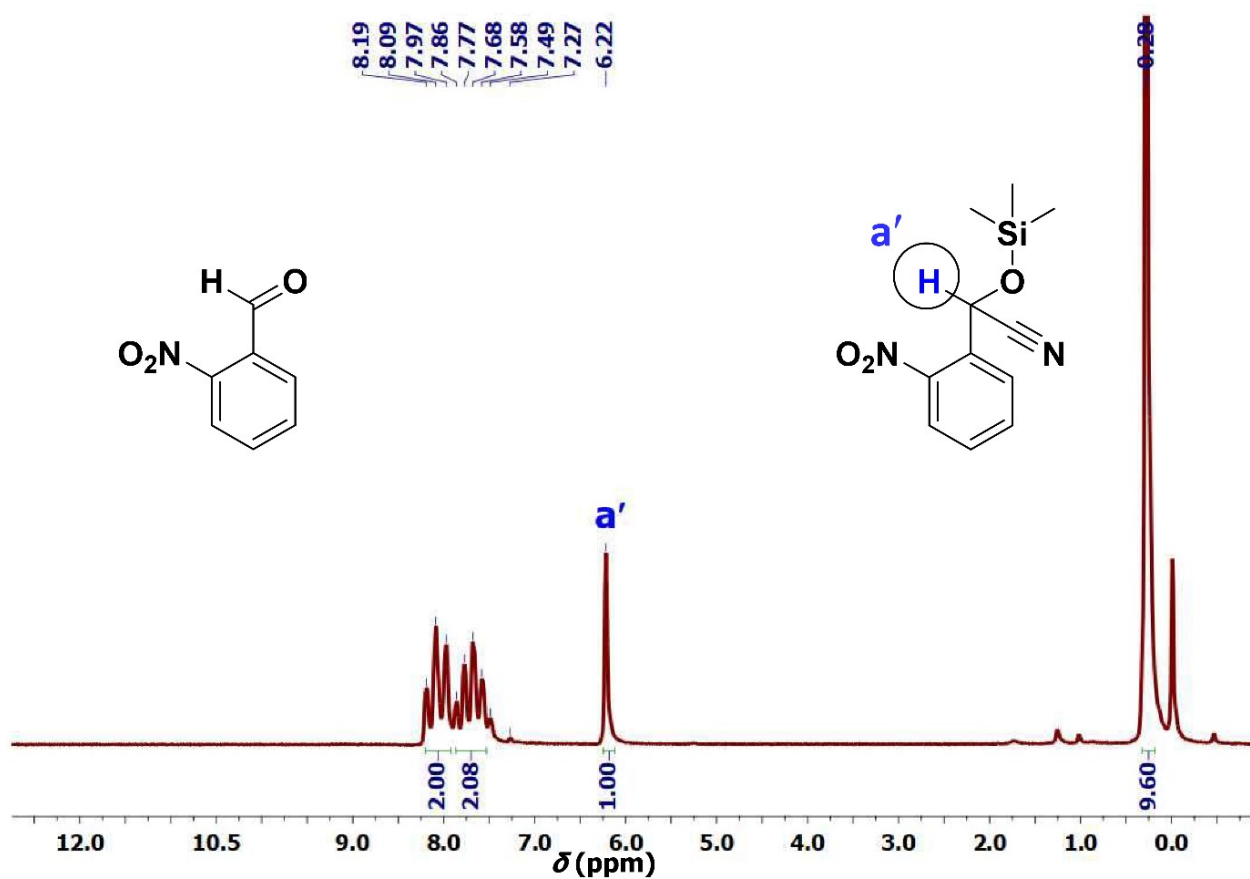

**Fig. S5.**  $^1\text{H}$  NMR spectrum of the product 2-(2-nitrophenyl)-2-((trimethylsilyl)oxy)acetonitrile obtained *via* cyanosilylation reaction of benzaldehyde (Entry 2 in Table 2) recorded in  $\text{CDCl}_3$ . The percentage conversion calculated for the product is 100.

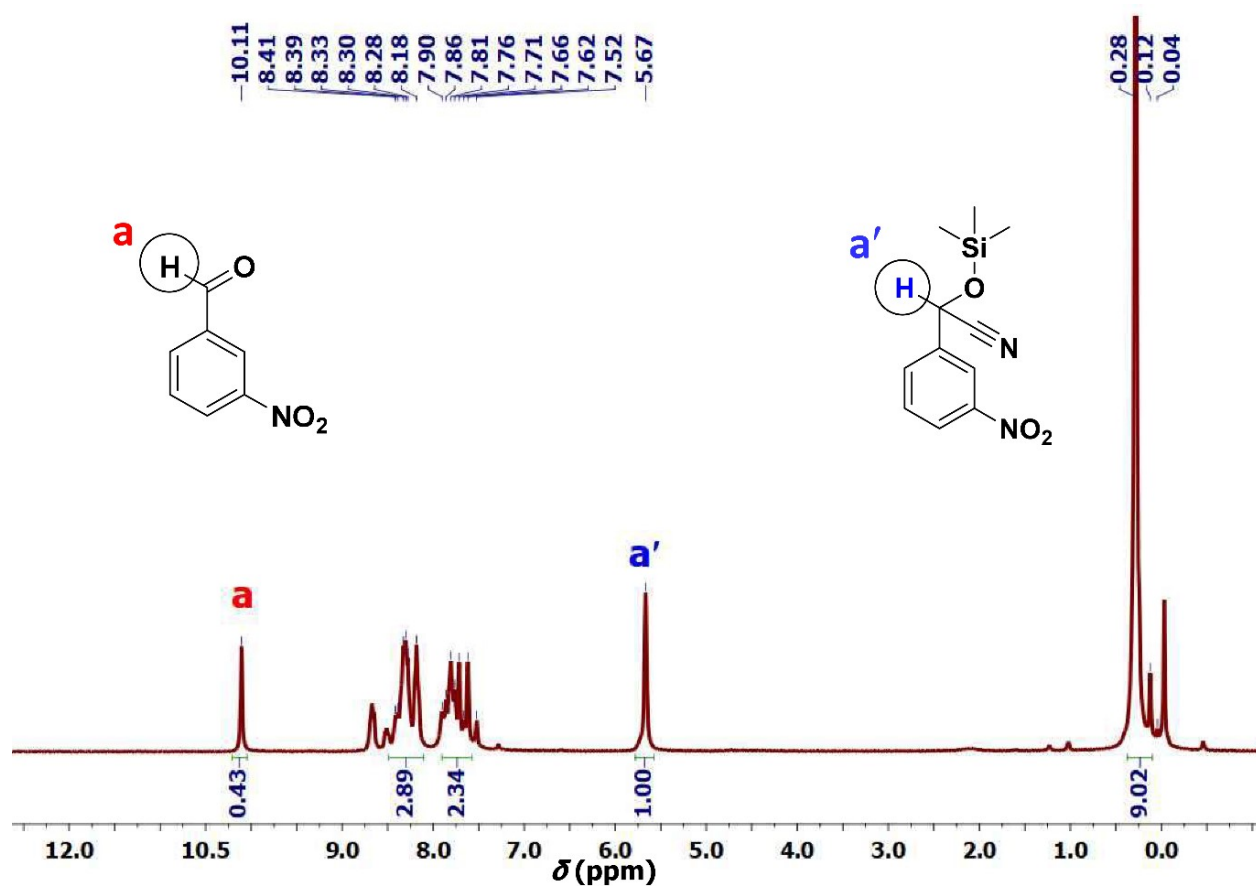

**Fig. S6.**  $^1\text{H}$  NMR spectrum of the product 2-(3-nitrophenyl)-2-((trimethylsilyl)oxy)acetonitrile obtained *via* cyanosilylation reaction of benzaldehyde (Entry 3 in Table 2) recorded in  $\text{CDCl}_3$ . The percentage conversion calculated for the product is 69.9.

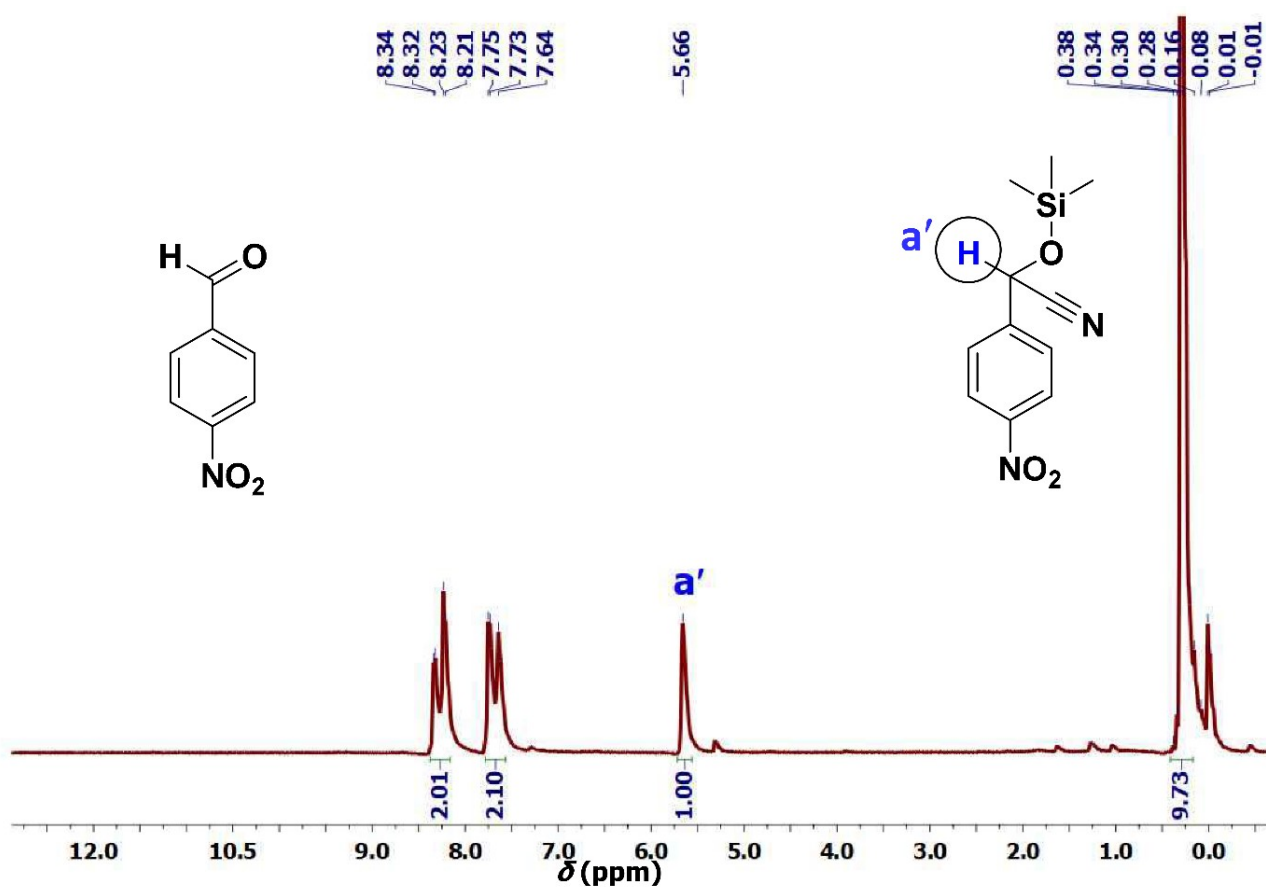

**Fig. S7.**  $^1\text{H}$  NMR spectrum of the product 2-(4-nitrophenyl)-2-((trimethylsilyl)oxy)acetonitrile obtained *via* cyanosilylation reaction of benzaldehyde (Entry 4 in Table 2) recorded in  $\text{CDCl}_3$ . The percentage conversion calculated for the product is 100.

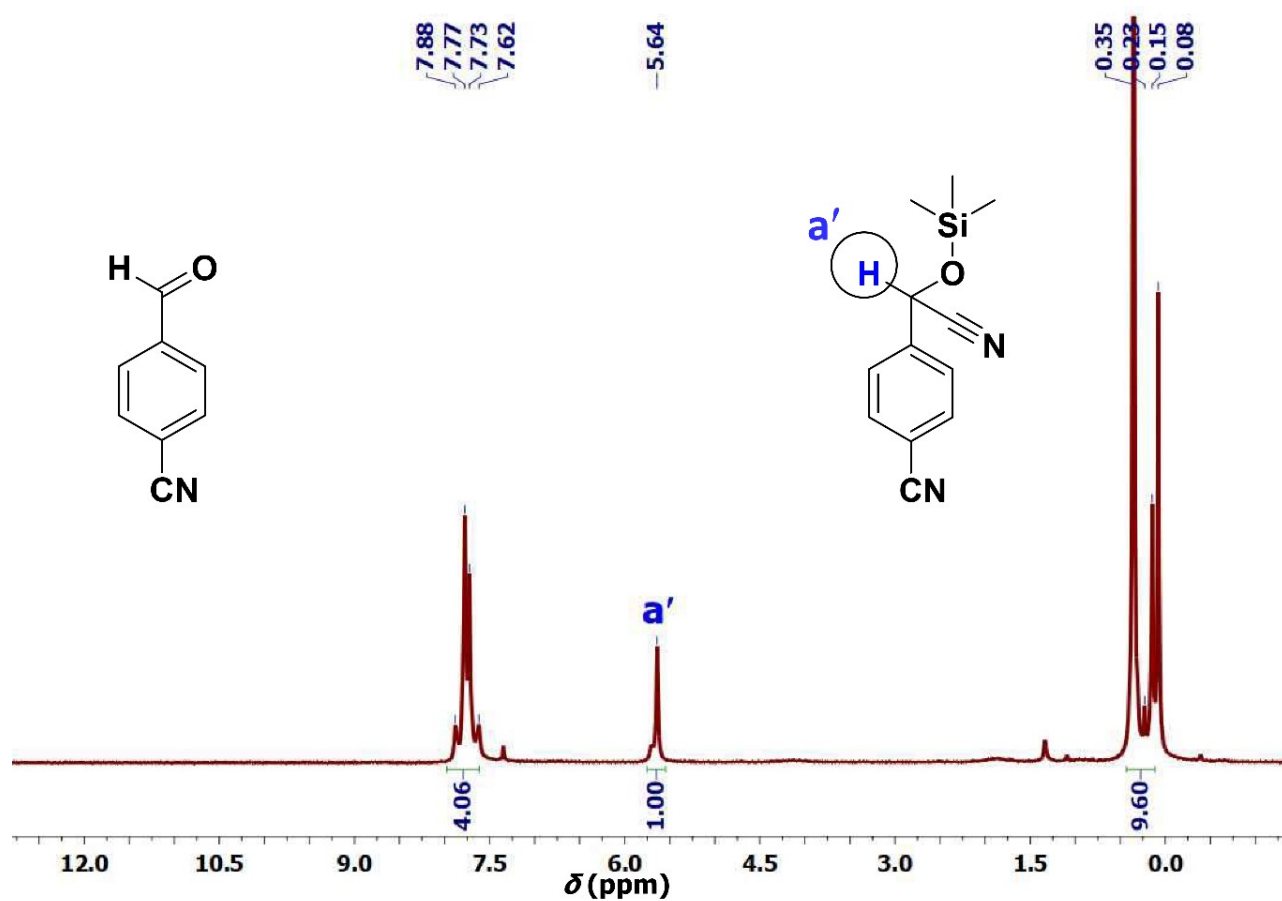

**Fig. S8.**  $^1\text{H}$  NMR spectrum of the product 4-(cyano((trimethylsilyl)oxy)methyl)benzonitrile obtained *via* cyanosilylation reaction of benzaldehyde (Entry 5 in Table 2) recorded in  $\text{CDCl}_3$ . The percentage conversion calculated for the product is 100.



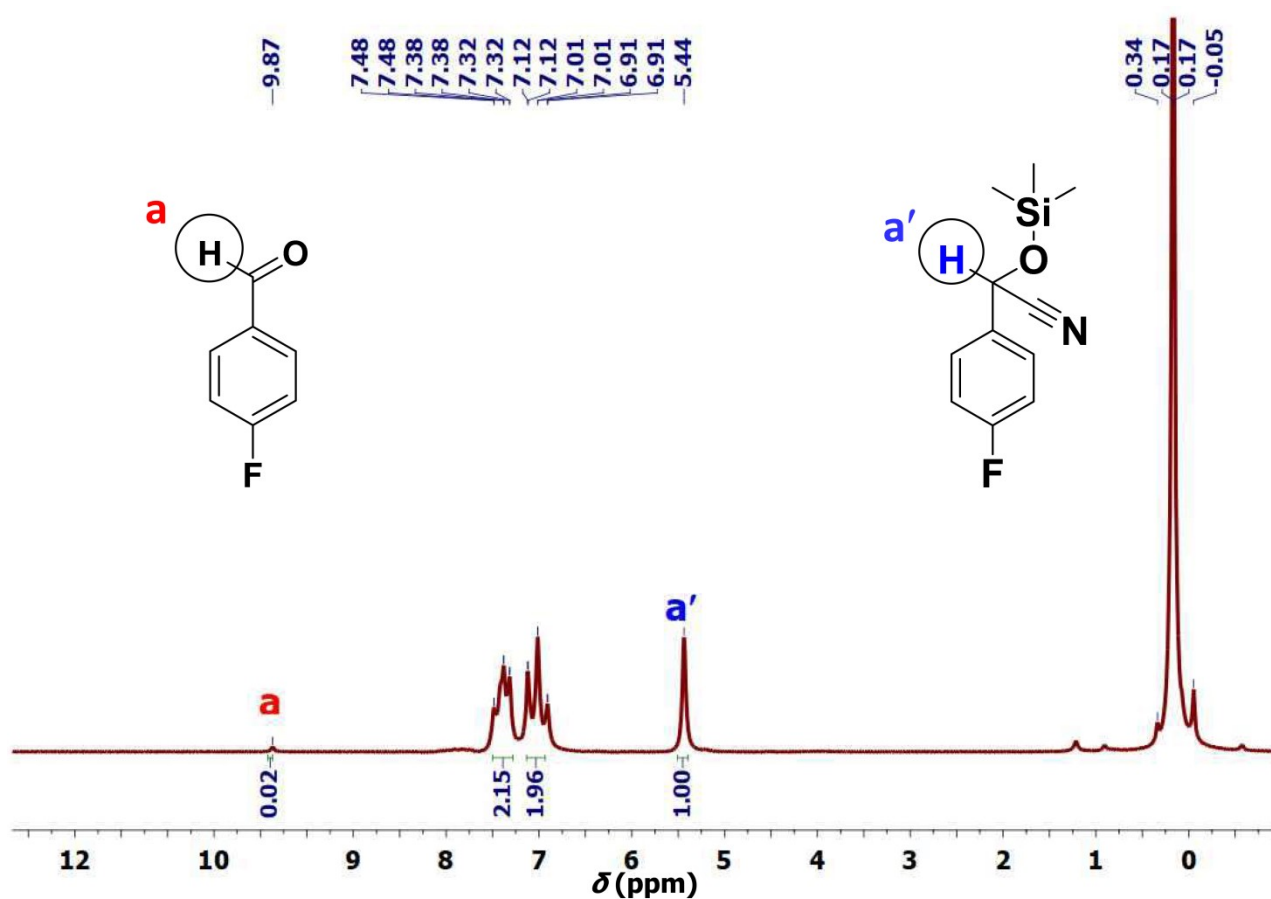

**Fig. S9.**  $^1\text{H}$  NMR spectrum of the product 2-(4-fluorophenyl)-2-((trimethylsilyl)oxy)acetonitrile obtained *via* cyanosilylation reaction of benzaldehyde (Entry 6 in Table 3) recorded in  $\text{CDCl}_3$ . The percentage conversion calculated for the product is 98.

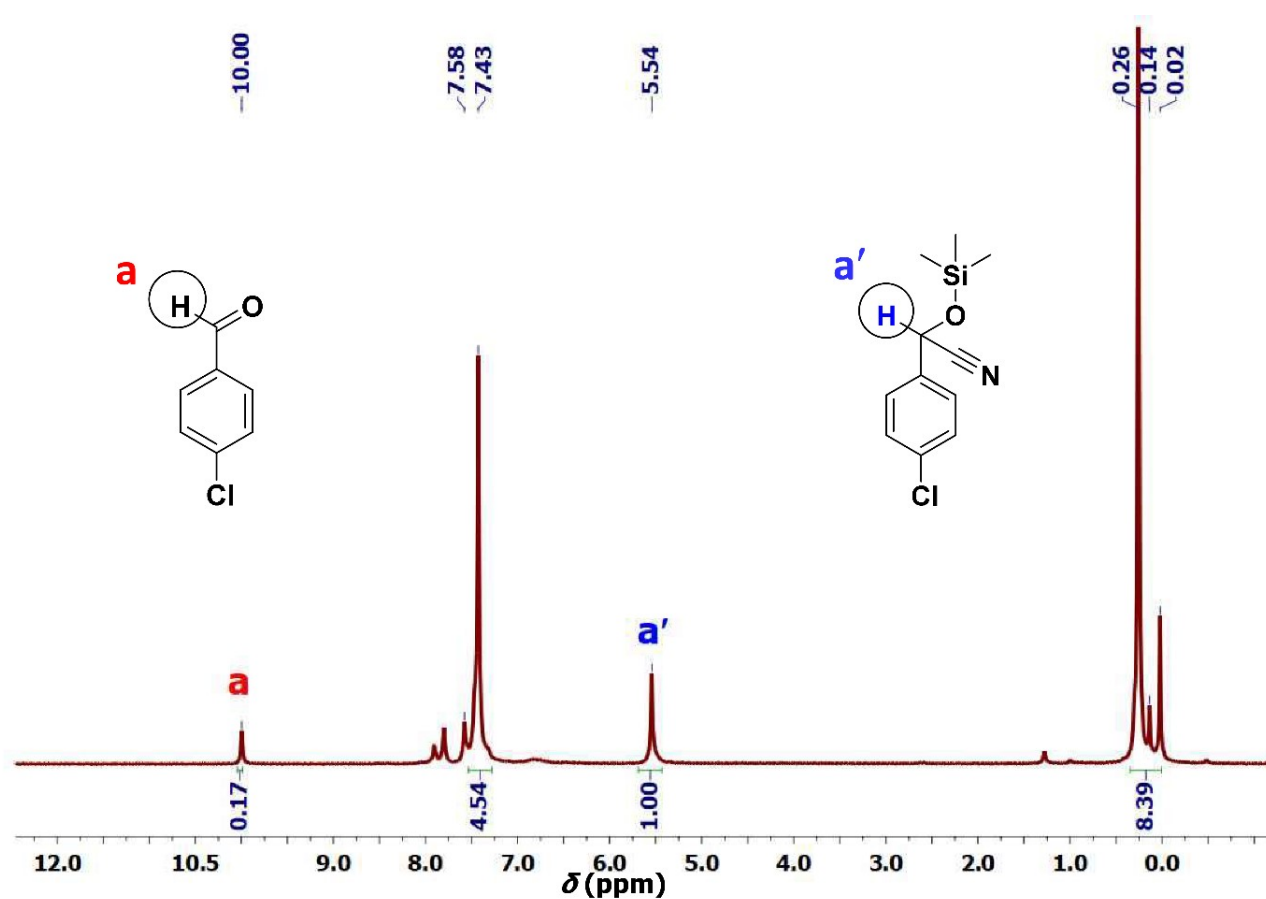

**Fig. S10.**  $^1\text{H}$  NMR spectrum of the product 2-(4-chlorophenyl)-2-((trimethylsilyl)oxy)acetonitrile obtained *via* cyanosilylation reaction of benzaldehyde (Entry 7 in Table 2) recorded in  $\text{CDCl}_3$ . The percentage conversion calculated for the product is 85.4.

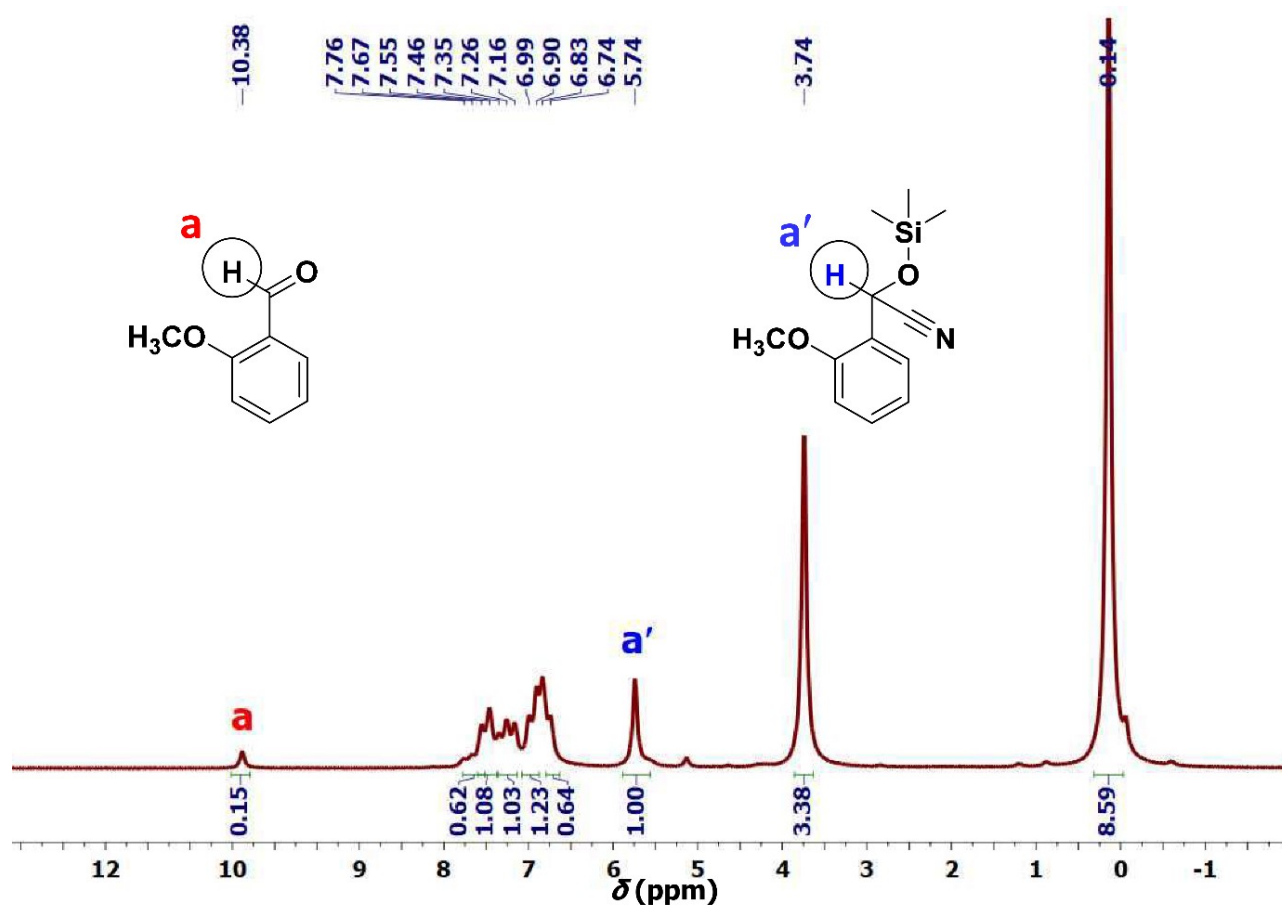

**Fig. S11.** <sup>1</sup>H NMR spectrum of the product 2-(2-methoxyphenyl)-2-((trimethylsilyl)oxy)acetonitrile obtained *via* cyanosilylation reaction of benzaldehyde (Entry 8 in Table 2) recorded in CDCl<sub>3</sub>. The percentage conversion calculated for the product is 86.9.

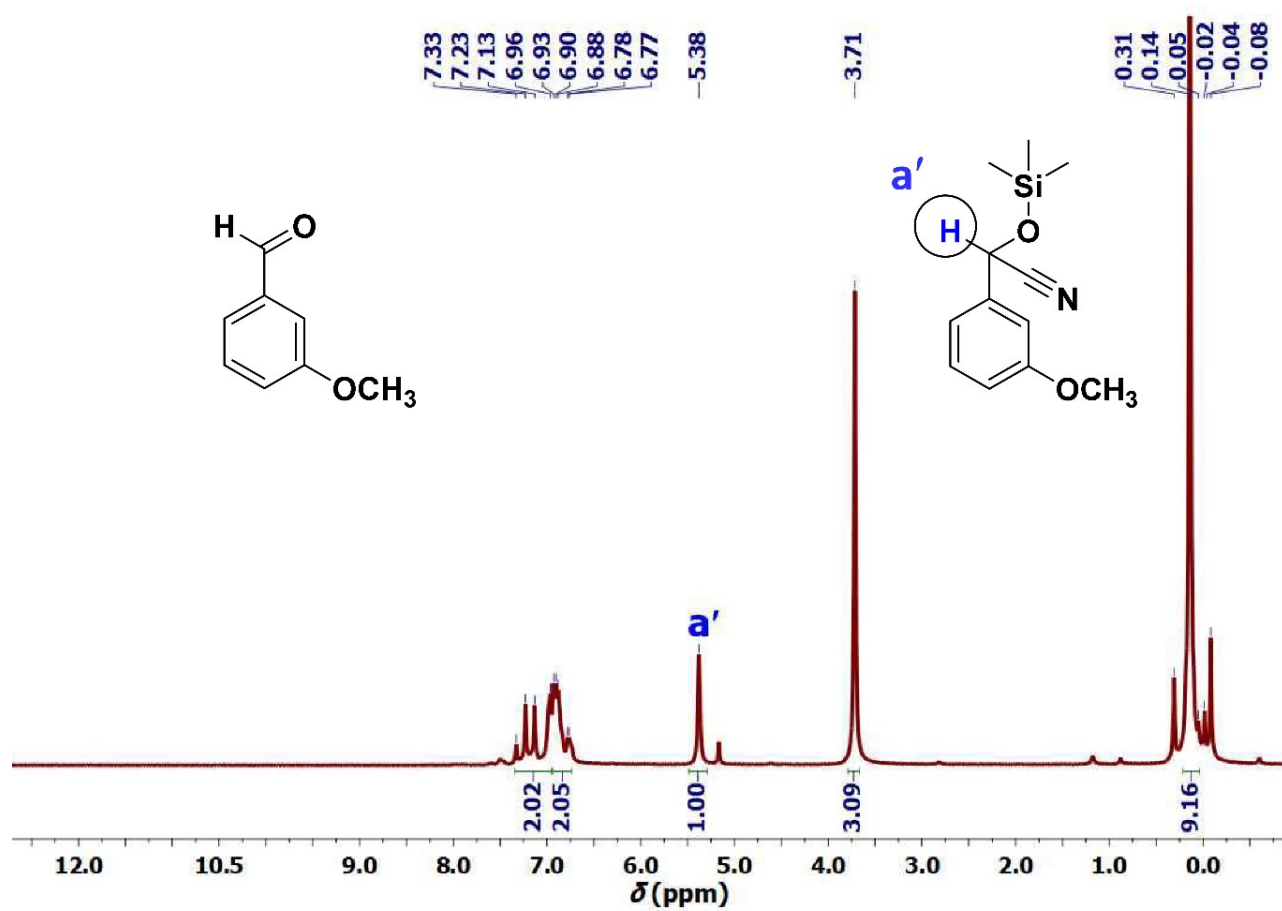

**Fig. S12.** <sup>1</sup>H NMR spectrum of the product 2-(3-methoxyphenyl)-2-((trimethylsilyl)oxy)acetonitrile obtained *via* cyanosilylation reaction of benzaldehyde (Entry 9 in Table 2) recorded in CDCl<sub>3</sub>. The percentage conversion calculated for the product is 100.

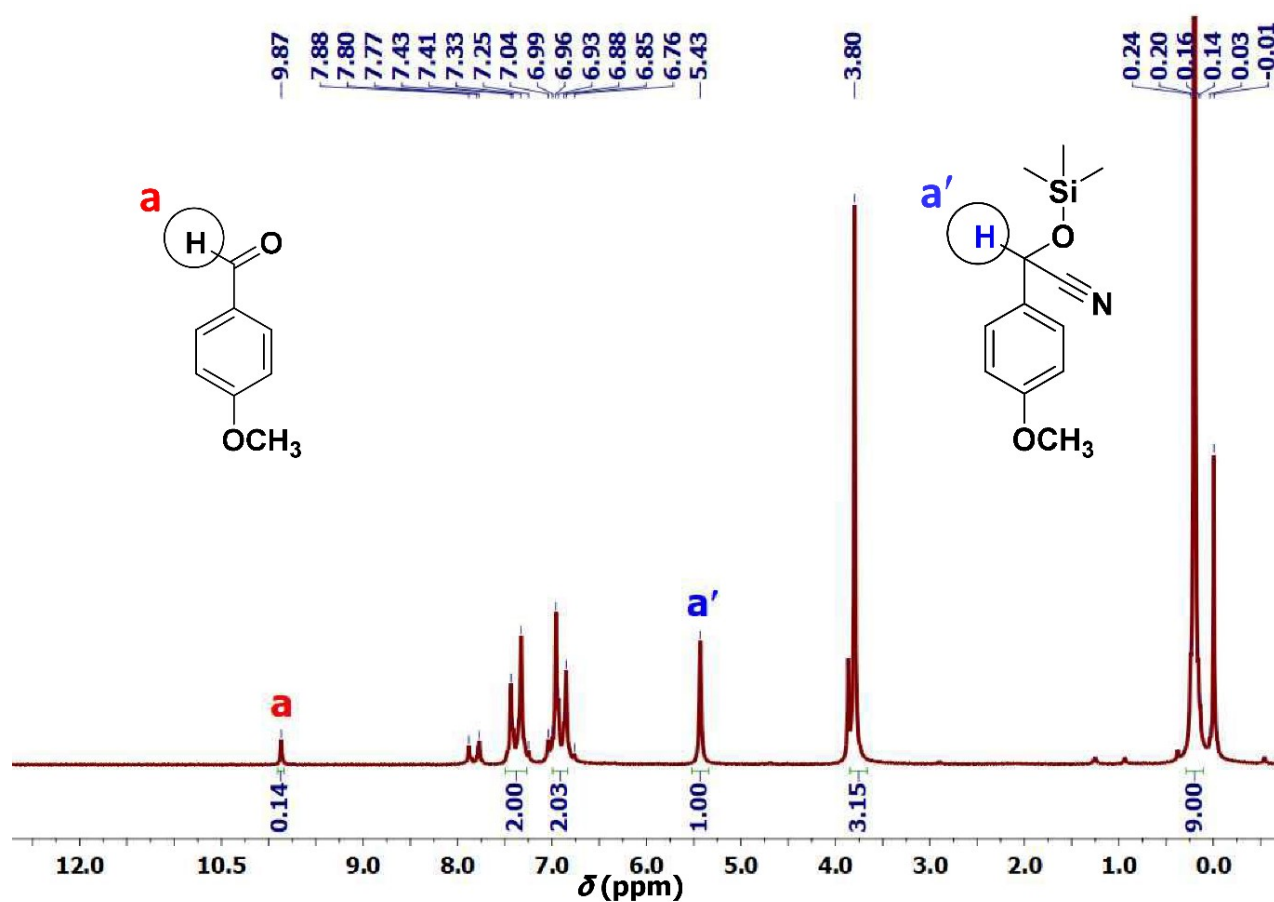

**Fig. S13.** <sup>1</sup>H NMR spectrum of the product 2-(4-methoxyphenyl)-2-((trimethylsilyl)oxy)acetonitrile obtained *via* cyanosilylation reaction of benzaldehyde (Entry 10 in Table 2) recorded in CDCl<sub>3</sub>. The percentage conversion calculated for the product is 87.7.

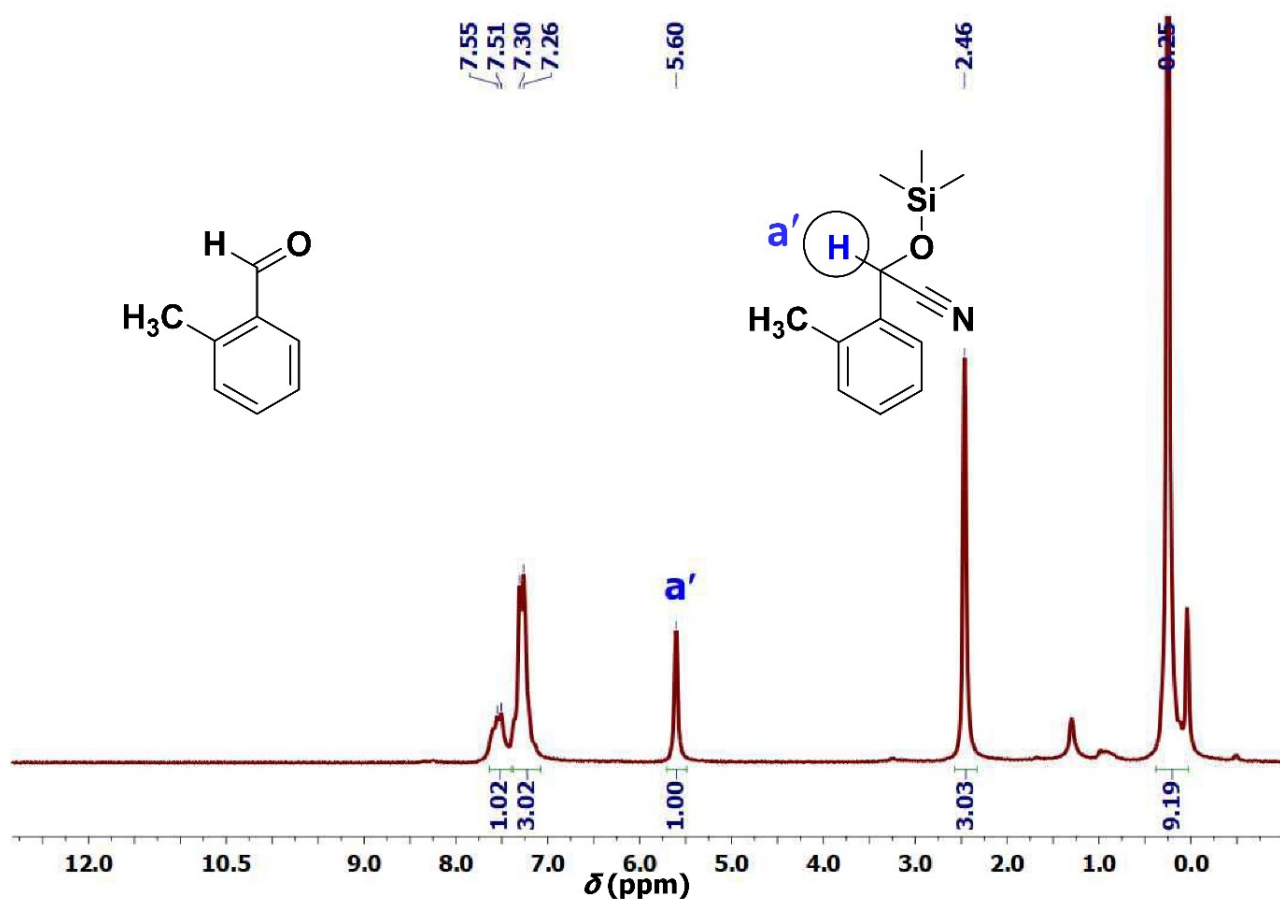

**Fig. S14.**  $^1\text{H}$  NMR spectrum of the product 2-(2-methylphenyl)-2-((trimethylsilyl)oxy)acetonitrile obtained *via* cyanosilylation reaction of benzaldehyde (Entry 11 in Table 2) recorded in  $\text{CDCl}_3$ . The percentage conversion calculated for the product is 100.

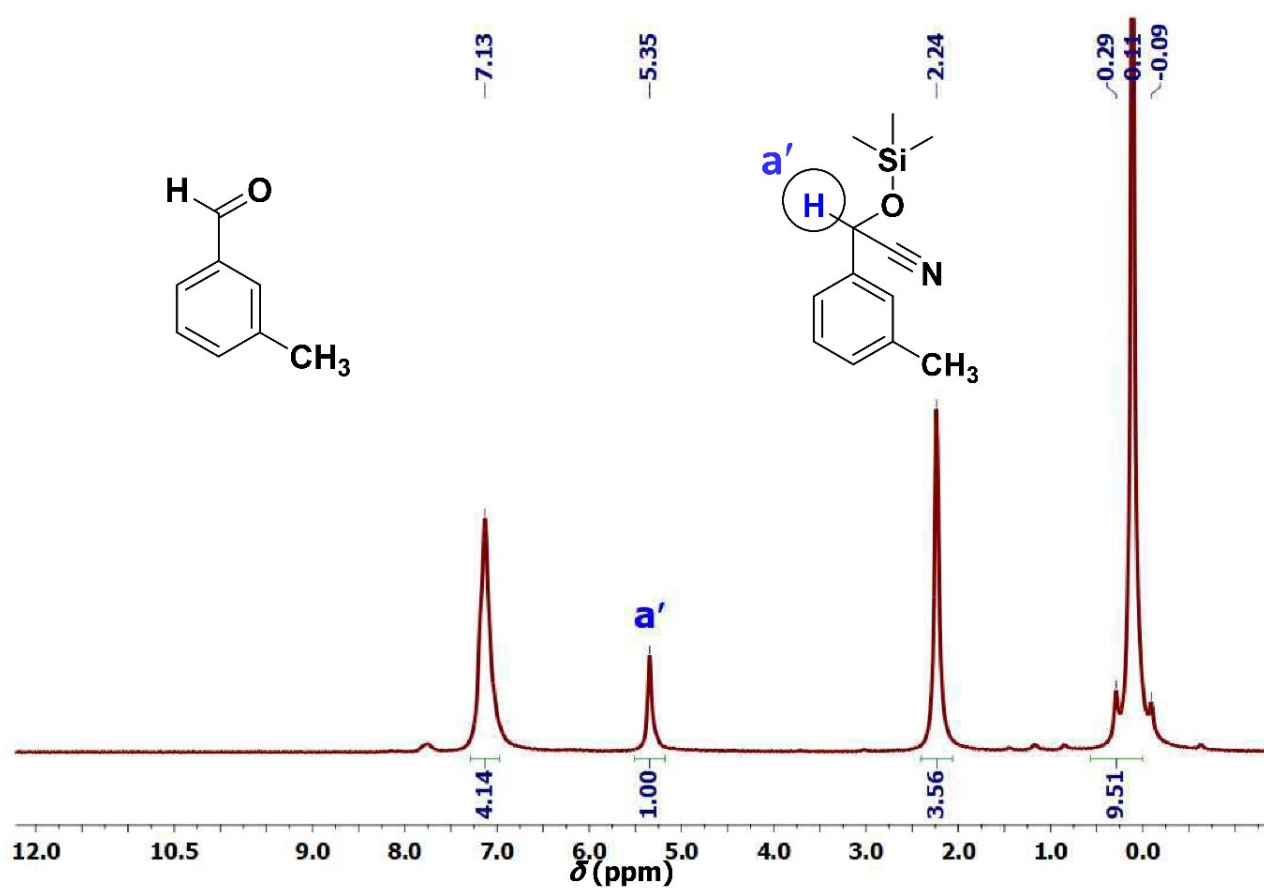

**Fig. S15.**  $^1\text{H}$  NMR spectrum of the product 2-(3-methylphenyl)-2-((trimethylsilyl)oxy)acetonitrile obtained *via* cyanosilylation reaction of benzaldehyde (Entry 12 in Table 2) recorded in  $\text{CDCl}_3$ . The percentage conversion calculated for the product is 100.

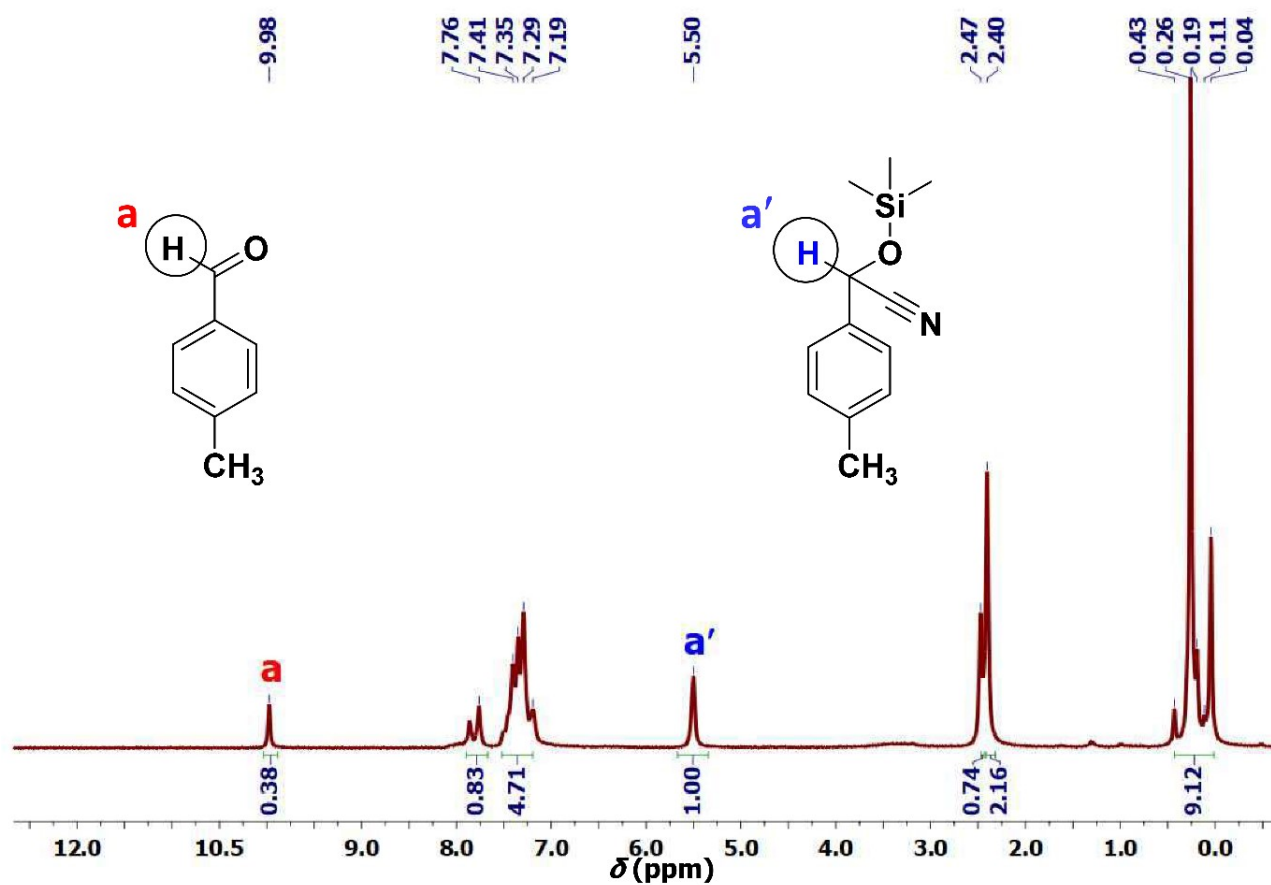

**Fig. S16.**  $^1\text{H}$  NMR spectrum of the product 2-(4-methylphenyl)-2-((trimethylsilyl)oxy)acetonitrile obtained *via* cyanosilylation reaction of benzaldehyde (Entry 13 in Table 2) recorded in  $\text{CDCl}_3$ . The percentage conversion calculated for the product is 72.4.



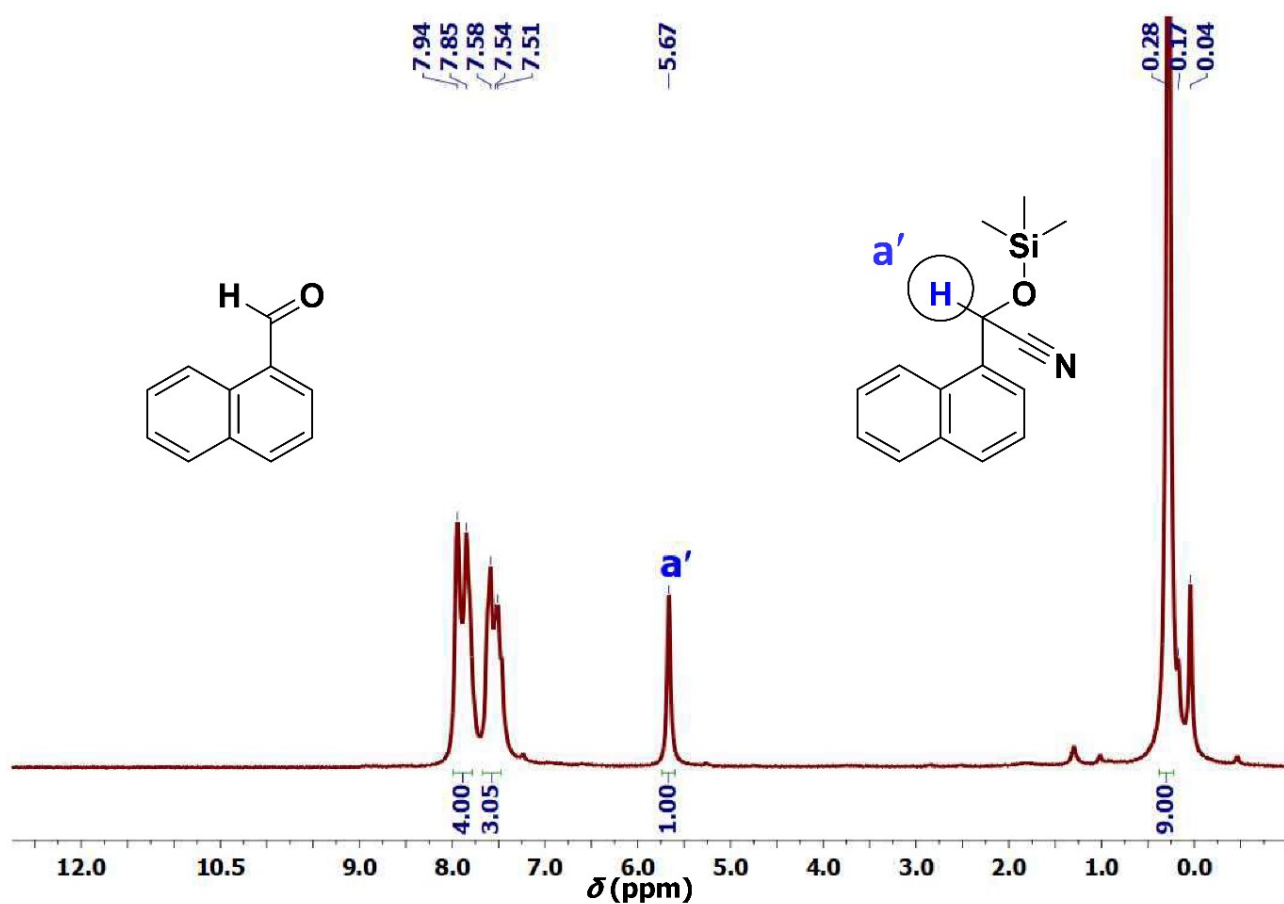

**Fig. S17.**  $^1\text{H}$  NMR spectrum of the product 2-(naphthyl)-2-((trimethylsilyl)oxy)acetonitrile obtained *via* cyanosilylation reaction of benzaldehyde (Entry 14 in Table 2) recorded in  $\text{CDCl}_3$ . The percentage conversion calculated for the product is 100.

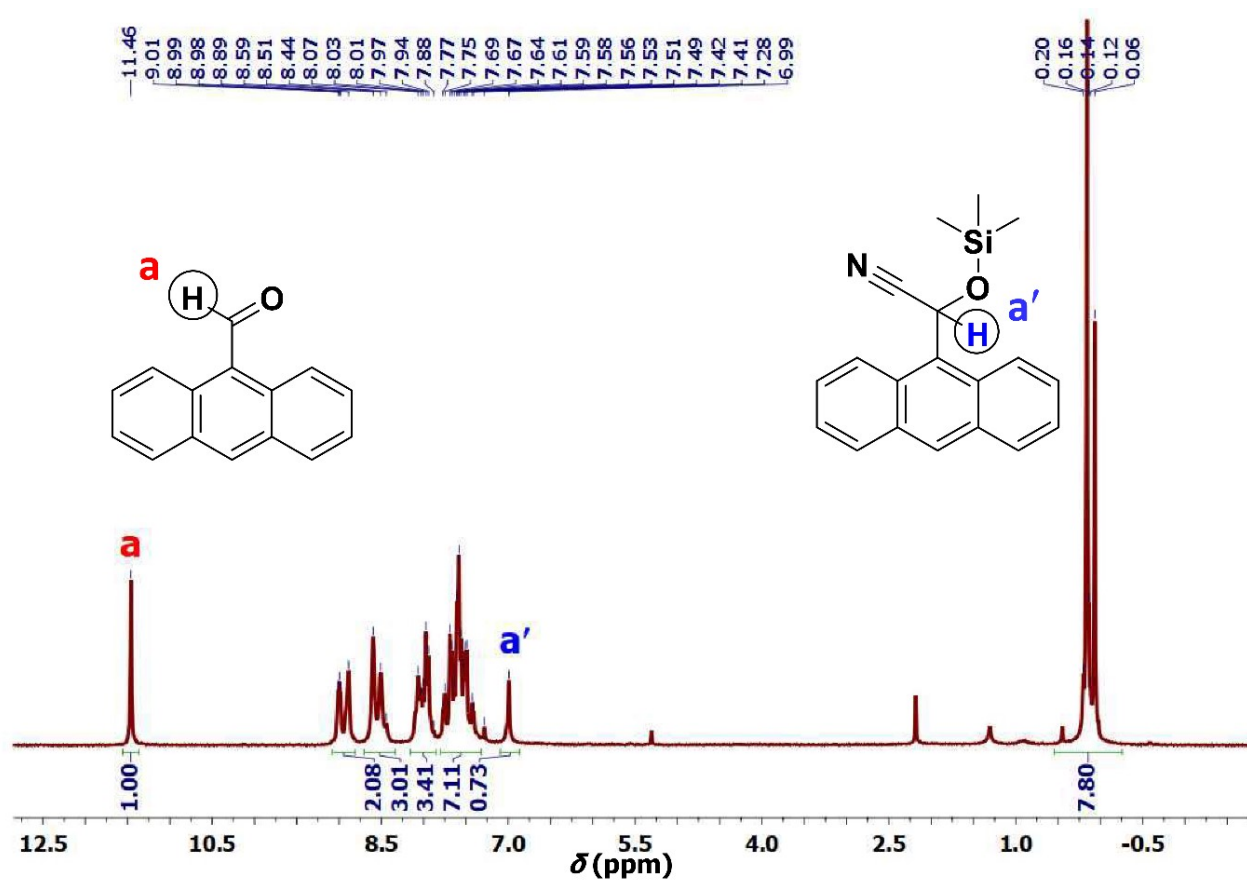

**Fig. S18.**  $^1\text{H}$  NMR spectrum of the product 2-(9-anthryl)-2-((trimethylsilyl)oxy)acetonitrile obtained *via* cyanosilylation reaction of benzaldehyde (Entry 15 in Table 2) recorded in  $\text{CDCl}_3$ . The percentage conversion calculated for the product is 42.1.

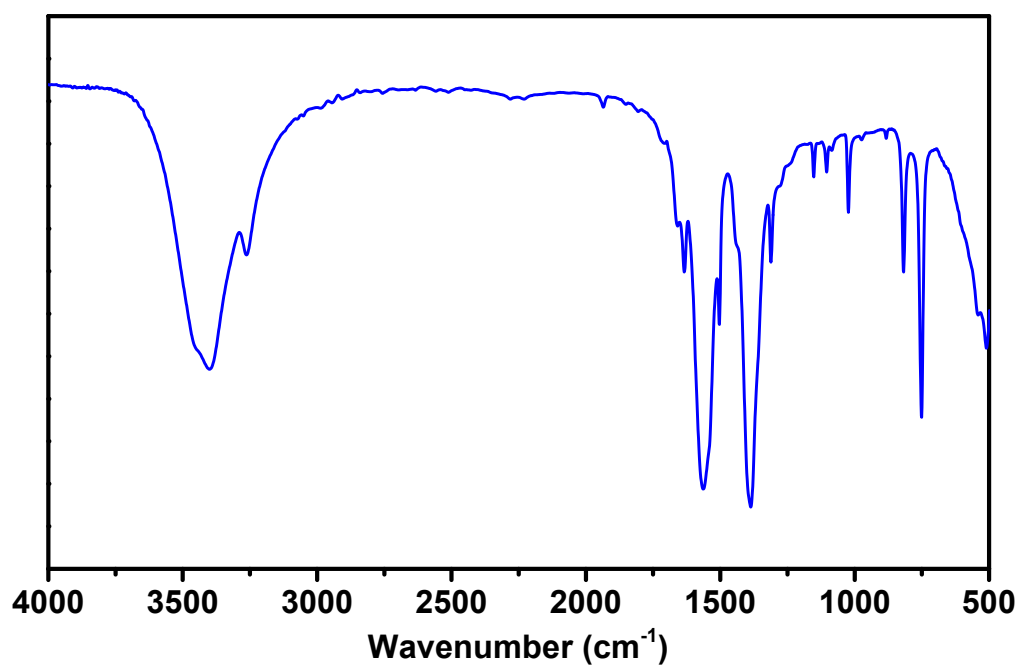

**Fig. S19.** FTIR spectrum of compound **1**.

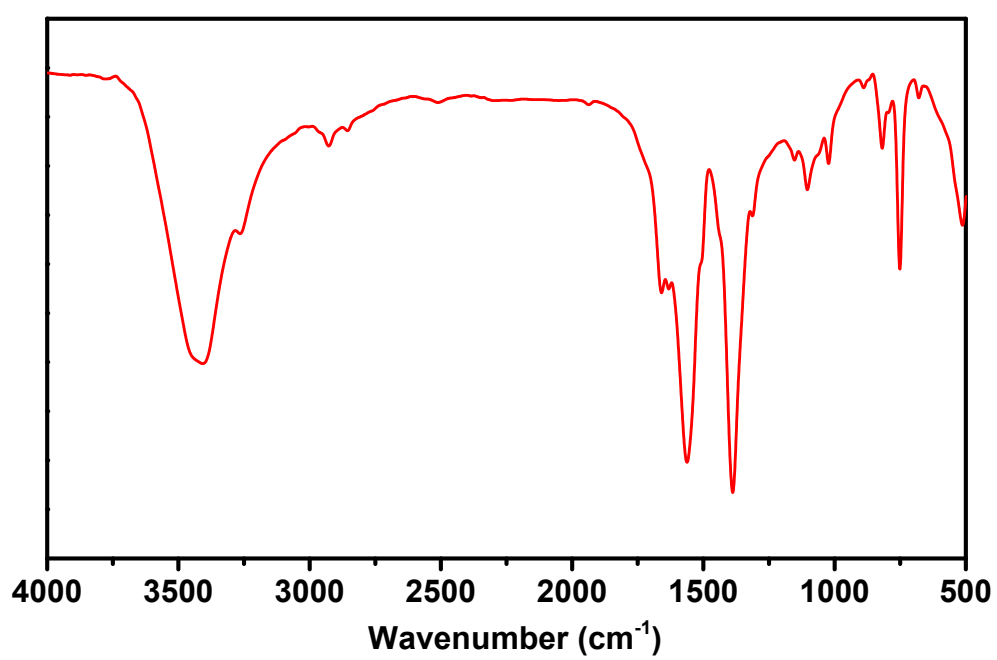

**Fig. S20.** FTIR spectrum of compound **1'**.

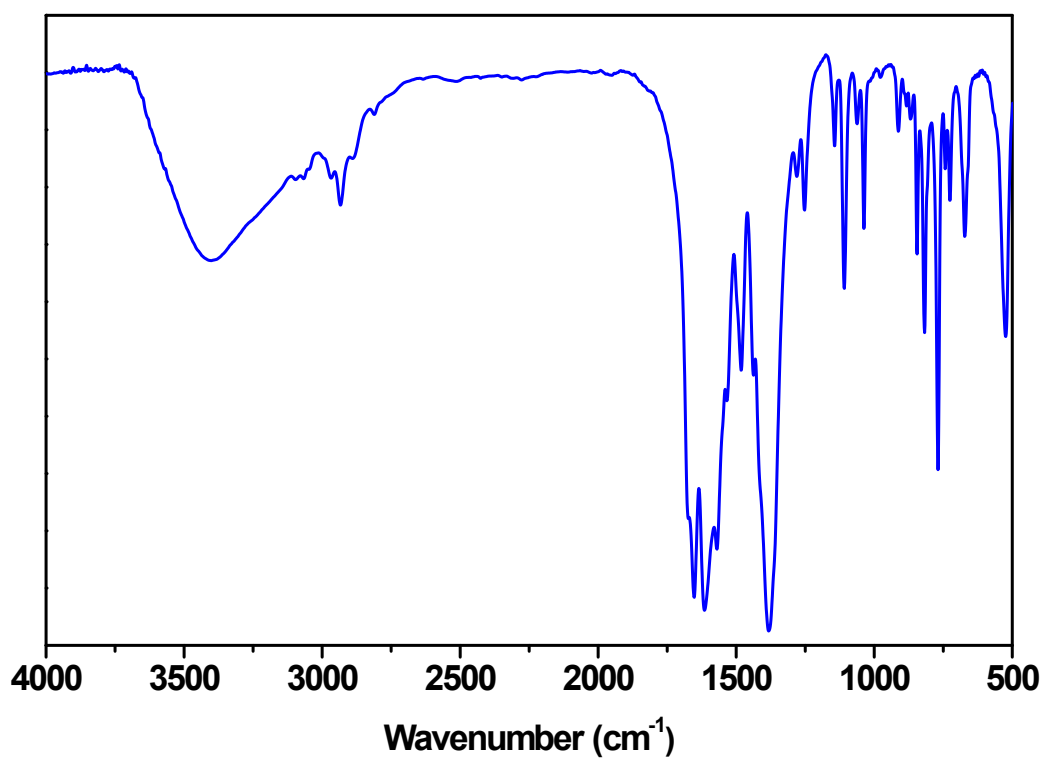

**Fig. S21.** FTIR spectrum of compound 2.

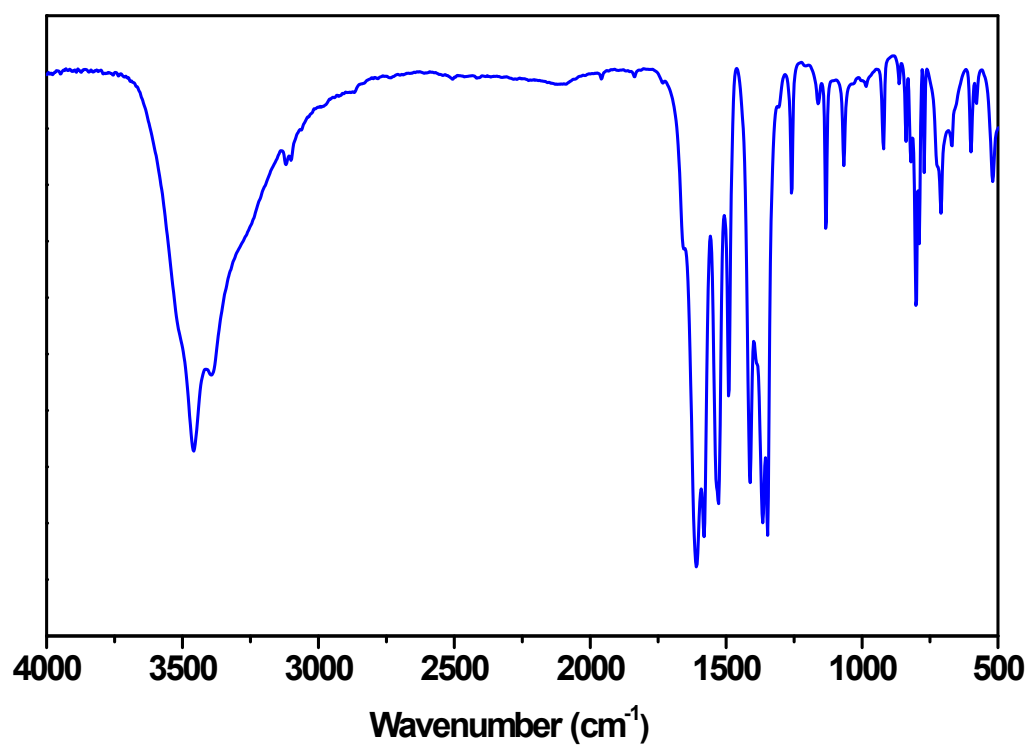

**Fig. S22.** FTIR spectrum of compound 3.
